## Early estimates of the incidence trend and the reproductive number of the monkeypox epidemic in Brazil

Isaac N. Schrarstzhaupt<sup>1</sup>, Mellanie Fontes-Dutra<sup>2</sup>, Fredi Alexander Diaz-Quijano<sup>3</sup>

<sup>1</sup> Capixaba Health Teaching, Research and Innovation Institute (ICEPi). <https://orcid.org/0000-0002-4451-3612>

<sup>2</sup> University of Vale do Rio dos Sinos (UNISINOS), School of Health, Rio Grande do Sul, RS, Brazil.  
<https://orcid.org/0000-0003-0334-0740>

<sup>3</sup> University of São Paulo, School of Public Health, Department of Epidemiology - Laboratory of Causal Inference in Epidemiology (LINCE-USP). São Paulo, SP, Brazil. <https://orcid.org/0000-0002-1134-1930>

Corresponding author: Isaac N. Schrarstzhaupt ([isaacjesus@gmail.com](mailto:isaacjesus@gmail.com))

### ABSTRACT

As of August 13, 2022, 2849 cases of monkeypox have been reported in Brazil. We analyzed the four states with the highest incidence and estimated an upward trend between 43.9% and 98.1%. We calculated that, after 20 days since the monkeypox introduction, reproductive numbers remained above 1.7.

**Keywords:** reproductive number<sub>1</sub>, Monkeypox<sub>2</sub>, outbreak<sub>3</sub>, Brazil<sub>4</sub>, epidemic<sub>5</sub>.

### Conflicts of Interest

The authors declare no conflict of interest.

### INTRODUCTION

In July of 2022, the World Health Organization declared that the monkeypox outbreak was a public health emergency of international concern (1). Until August 13, 2022, there were 35,414 confirmed cases and seven deaths worldwide. In Brazil, the first case was confirmed on June 8, 2022, and 2,849 have been confirmed cases until August 13, 2022 (2).

Incidence trends and transmissibility measures are essential to recognize the potential extension of the epidemic and to guide public health interventions (3).

Consequently, we estimated the relative increase and the  $R_t$  (effective reproductive number) of the monkeypox incidence in Brazilian states with the highest number of cases.

## METHODS

This was an ecological study based on surveillance data of the epidemiological reports posted by the Brazilian National Health Ministry (4). We created a database with the new and accumulated cases (5). Our analysis focused on the four states with more than 100 cases up to August 13, 2022. These states were São Paulo (SP), Rio de Janeiro (RJ), Minas Gerais (MG), and Goiás, which geographically includes the Federal District of Brasilia (GO-FD).

We only analyzed confirmed cases defined as suspected cases with positive PCR results for the Monkeypox virus (6). We estimated the weekly growth of the incidence of Monkeypox using two regression approaches starting one day after the first case was reported. First, we used the count models of Poisson and negative binomial regression and reported the last one when the alpha term differed significantly from zero. We also applied the Prais-Winsten regression to the natural logarithm of the weekly case count. For each state, we reported the relative incidence increase calculated as  $1 - e^{-\beta}$ , where  $\beta$  is the regression coefficient.

To estimate  $R_t$ , we used the "estimate\_R" package contained in the "EpiEstim" library of the R programming language (7). We used the "parametric\_si" configuration of the package. The script is available as supplementary material. One of the parameters needed to estimate the  $R_t$  is the serial interval (SI), i.e., the time between the illness onset in the primary case and that in a secondary. Since the microdata of Monkeypox cases in Brazil are unavailable, we used a predefined SI recently calculated in the United Kingdom (8). That SI was obtained from 17 pairs of cases (primary - secondary), exhibiting a mean of 9.8 days and a standard deviation of 9.1 days (8). For each state, we calculated the mean  $R_t$  after the 20th day since the outbreak, when we observed a more stable daily  $R_t$ .

This study used public data, and the analysis was performed using R (version 4.2.1) and Stata (version 17.0, Stata Corp LP, College Station, TX, USA).

## RESULTS

The state with the most cases was SP, followed by RJ and GO-FD (figure 1). However, the highest relative increase of incidence was observed in GO-FD, being 98.1% per week according to the Poisson model and 95.1% using the Prais-Winsten regression. In all states, the increasing trend was statistically significant with both regression approaches (Table).

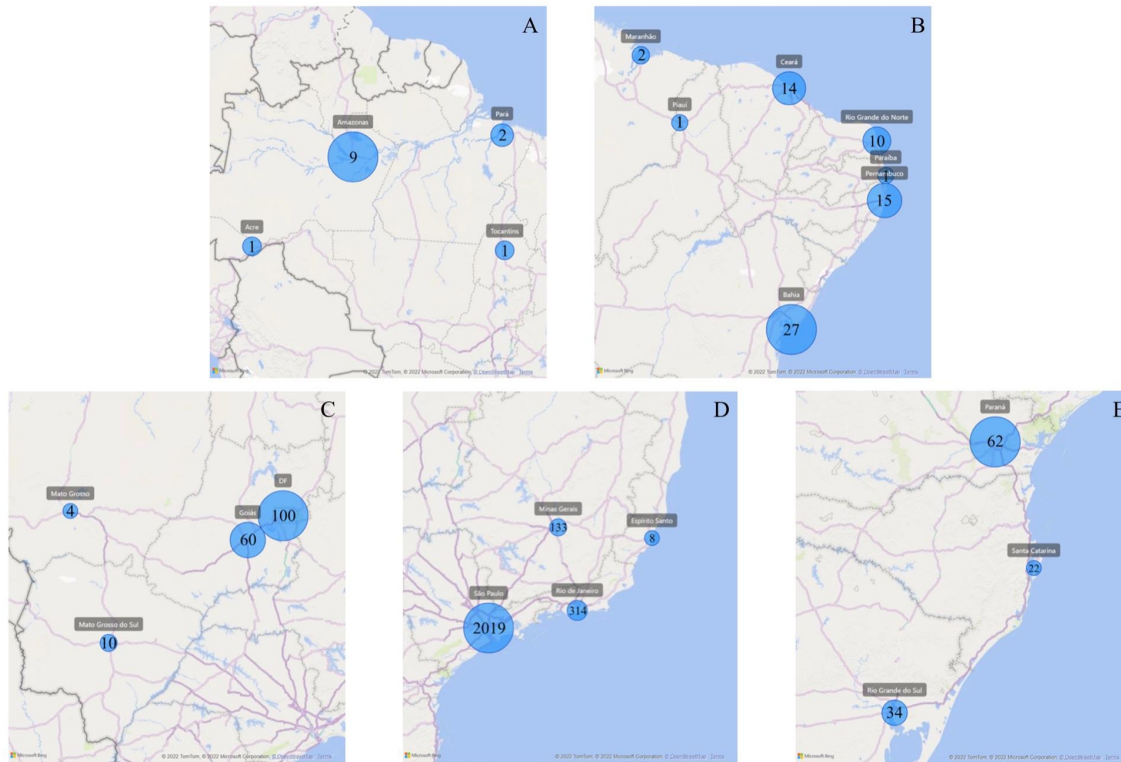

Figure 1: Brazil maps with Monkeypox incidence by region: North (A), Northeast (B), Center West (C), Southeast (D) and South (E)

**Table. Relative incidence increase and reproductive number of monkeypox epidemic in the most affected states of Brazil.**

| State              | Weekly incidence increase (95% CI) |                        | Rt – mean (95% CI) |
|--------------------|------------------------------------|------------------------|--------------------|
|                    | Count model*                       | Prais-Winsten          |                    |
| GO-FD <sup>†</sup> | 98.1% (74.1% - 125.5%)             | 95.1% (56.8% - 142.8%) | 2.28 (2.02 – 2.56) |
| SP <sup>‡</sup>    | 61.9% (38.9% - 88.6%)              | 62.3% (34.5% - 95.8%)  | 1.94 (1.88 – 1.99) |
| RJ <sup>§</sup>    | 43.9% (26.3% - 63.9%)              | 47% (24.9% - 73.1%)    | 1.77 (1.66 – 1.89) |
| MG <sup>¶</sup>    | 45.9% (31.7% - 61.6%)              | 44.7% (39.6% - 50%)    | 1.71 (1.54 – 1.89) |

\*Estimates were obtained with negative binomial regression for RJ and SP (p-value of alpha=0: 0.002 and 0.001, respectively) and with Poisson regression for the other states. <sup>†</sup> GO-FD: the state of Goiás plus Federal District (Brasília); <sup>‡</sup>SP: São Paulo; <sup>§</sup>RJ: Rio de Janeiro; <sup>¶</sup>MG: Minas Gerais.

The daily  $R_t$  oscillated between 1.9 and 3.1 in GO-FD, 1.5 and 2.2 in SP, 1.6 and 2.1 in RJ, and 1.6 and 2.0 in MG (figure 2). The means of  $R_t$  in those states were respectively: 2.28, 1.94, 1.77, and 1.71 (Table).

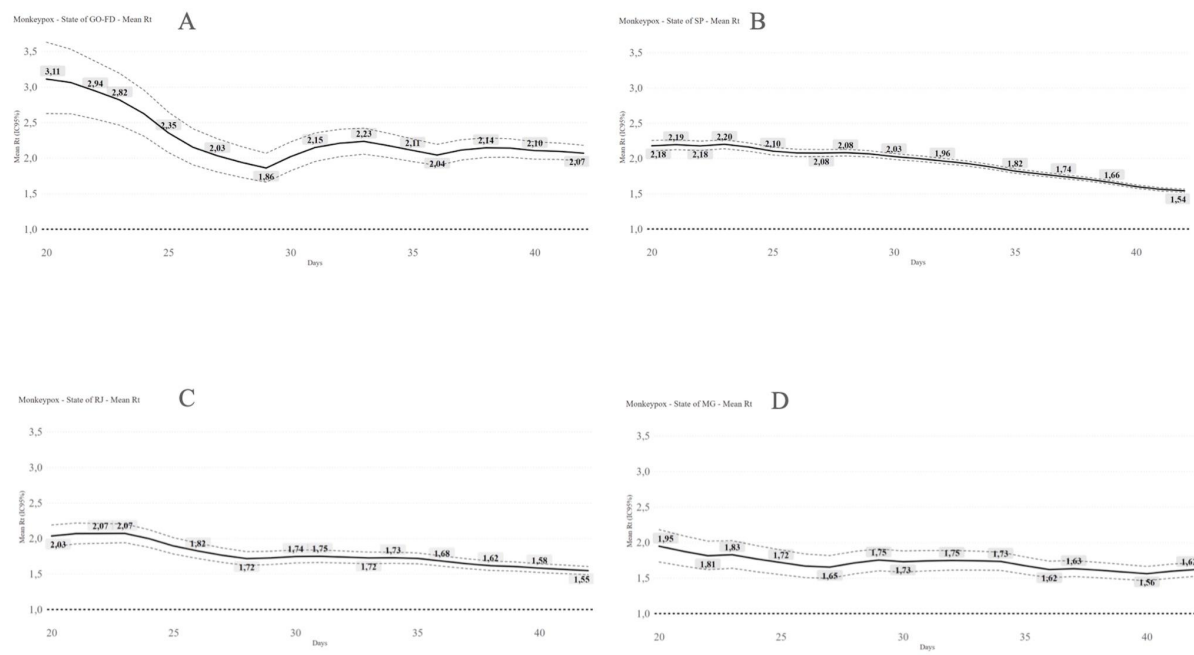

Figure 2: Effective reproductive number ( $R_t$ ) of monkeypox epidemic in four Brazilian states. GO-FD (A), SP (B), RJ (C) and MG (D).

## DISCUSSION

The confirmed Monkeypox cases in Brazil up to August 13, 2022, was more than double of the 1.369 cases that were notified up to July 31, 2022. We observed that the  $R_t$  of the four analyzed states may be comparable with some calculated for covid-19 (9). Monkeypox transmission appears to mainly occur by direct contact in the current outbreak (10) has a high viral load on skin lesions (11) and there is evidence of a lesion staying positive on the PCR test for up to 21 days (12). We hypothesize that a prolonged infectious period could explain those  $R_t$  values.

Our study had some methodological limitations. The sample size was limited and  $R_t$  can be unstable during the early stage of epidemic. Therefore, we restricted our analysis to four states and  $R_t$  was estimated after the 20th day of the first case. It is also important to note that we estimated the  $R_t$  with a fixed SI obtained from another population (8). Even though the virus is the same involved in the current outbreak, we recommend replicating the  $R_t$  estimations using locally obtained SI (when available). Nonetheless, by using this preset SI we could compare the profile of the states with a higher number of Monkeypox cases. In that sense, our  $R_t$  estimates correlated well with the observed upward trends across the states, which give a reference of the potential transmissibility of Monkeypox.

This study illustrated the critical and significant growth of Monkeypox cases in Brazil, highlighting the need for effective public health measures such as testing, contact tracing, and vaccination of the risk groups. It also stood out the importance of surveillance to ensure that all cases are timely studied and their potential determinants well documented.

### **Acknowledgements**

We would like to acknowledge Leonardo Medeiros for collecting the data from the Brazilian Health Ministry online publishings.

### **Funding Statement**

This work had no specific funding. However, FADQ is beneficiary of a fellowship for research productivity from the National Council for Scientific and Technological Development - CNPq, process/contract identification: 312656/2019-0.

## REFERENCES

1. WHO Director-General's statement at the press conference following IHR Emergency Committee regarding the multi-country outbreak of monkeypox - 23 July 2022 [Internet]. [cited 2022 Aug 12]. Available from: <https://www.who.int/director-general/speeches/detail/who-director-general-s-statement-on-the-press-conference-following-IHR-emergency-committee-regarding-the-multi-country-outbreak-of-monkeypox--23-july-2022>
2. Global.health | Map [Internet]. [cited 2022 Aug 12]. Available from: <https://map.monkeypox.global.health/country>
3. Ridenhour B, Kowalik JM, Shay DK. Unraveling R0: Considerations for Public Health Applications. *Am J Public Health*. 2014 Feb;104(2):e32–41.
4. Atualização dos Casos [Internet]. Ministério da Saúde. [cited 2022 Aug 12]. Available from: <https://www.gov.br/saude/pt-br/composicao/svs/resposta-a-emergencias/coes/monkeypox/atualizacao-dos-casos>
5. Monkeypox Brasil - Casos [Internet]. Google Docs. [cited 2022 Aug 12]. Available from: [https://docs.google.com/spreadsheets/d/1oL1YDwv1RKHGTsijWDvahVgqHrEcIw0JEGY5Ti-5clA/edit?usp=embed\\_facebook](https://docs.google.com/spreadsheets/d/1oL1YDwv1RKHGTsijWDvahVgqHrEcIw0JEGY5Ti-5clA/edit?usp=embed_facebook)
6. Definição de Caso [Internet]. Ministério da Saúde. [cited 2022 Aug 12]. Available from: <https://www.gov.br/saude/pt-br/assuntos/variola-dos-macacos/definicao-de-caso/definicao-de-caso>
7. make\_config function - RDocumentation [Internet]. [cited 2022 Aug 12]. Available from: [https://www.rdocumentation.org/packages/EpiEstim/versions/2.2-4/topics/make\\_config](https://www.rdocumentation.org/packages/EpiEstim/versions/2.2-4/topics/make_config)
8. Kwok KO, Wei WI, Tang A, Shan Wong SY, Tang JW. Estimation of local transmissibility in the early phase of monkeypox epidemic in 2022. *Clin Microbiol Infect* [Internet]. 2022 Jul 8 [cited 2022 Aug 12]; Available from: <https://www.sciencedirect.com/science/article/pii/S1198743X22003408>
9. Billah MA, Miah MM, Khan MN. Reproductive number of coronavirus: A systematic review and meta-analysis based on global level evidence. *PloS One*. 2020;15(11):e0242128.
10. Monkeypox [Internet]. [cited 2022 Aug 14]. Available from: <https://www.who.int/news-room/fact-sheets/detail/monkeypox>
11. Tarín-Vicente EJ, Alemany A, Agud-Dios M, Ubals M, Suñer C, Antón A, et al. Clinical presentation and virological assessment of confirmed human monkeypox virus cases in Spain: a prospective observational cohort study. *The Lancet* [Internet]. 2022 Aug 8 [cited 2022 Aug 15];0(0). Available from: [https://www.thelancet.com/journals/lancet/article/PIIS0140-6736\(22\)01436-2/fulltext#sectitle10](https://www.thelancet.com/journals/lancet/article/PIIS0140-6736(22)01436-2/fulltext#sectitle10)
12. Thornhill JP, Barkati S, Walmsley S, Rockstroh J, Antinori A, Harrison LB, et al. Monkeypox Virus Infection in Humans across 16 Countries — April–June 2022. *N Engl J Med*. 2022 Jul 21;0(0):null.
